# Supplementary material for: Electronic Voting to Improve Morbidity and Mortality Conferences
Source: Springer Nature journal article supplement (doi:10.1007/s00268-018-4670-2), 2018-05-16

# General error culture

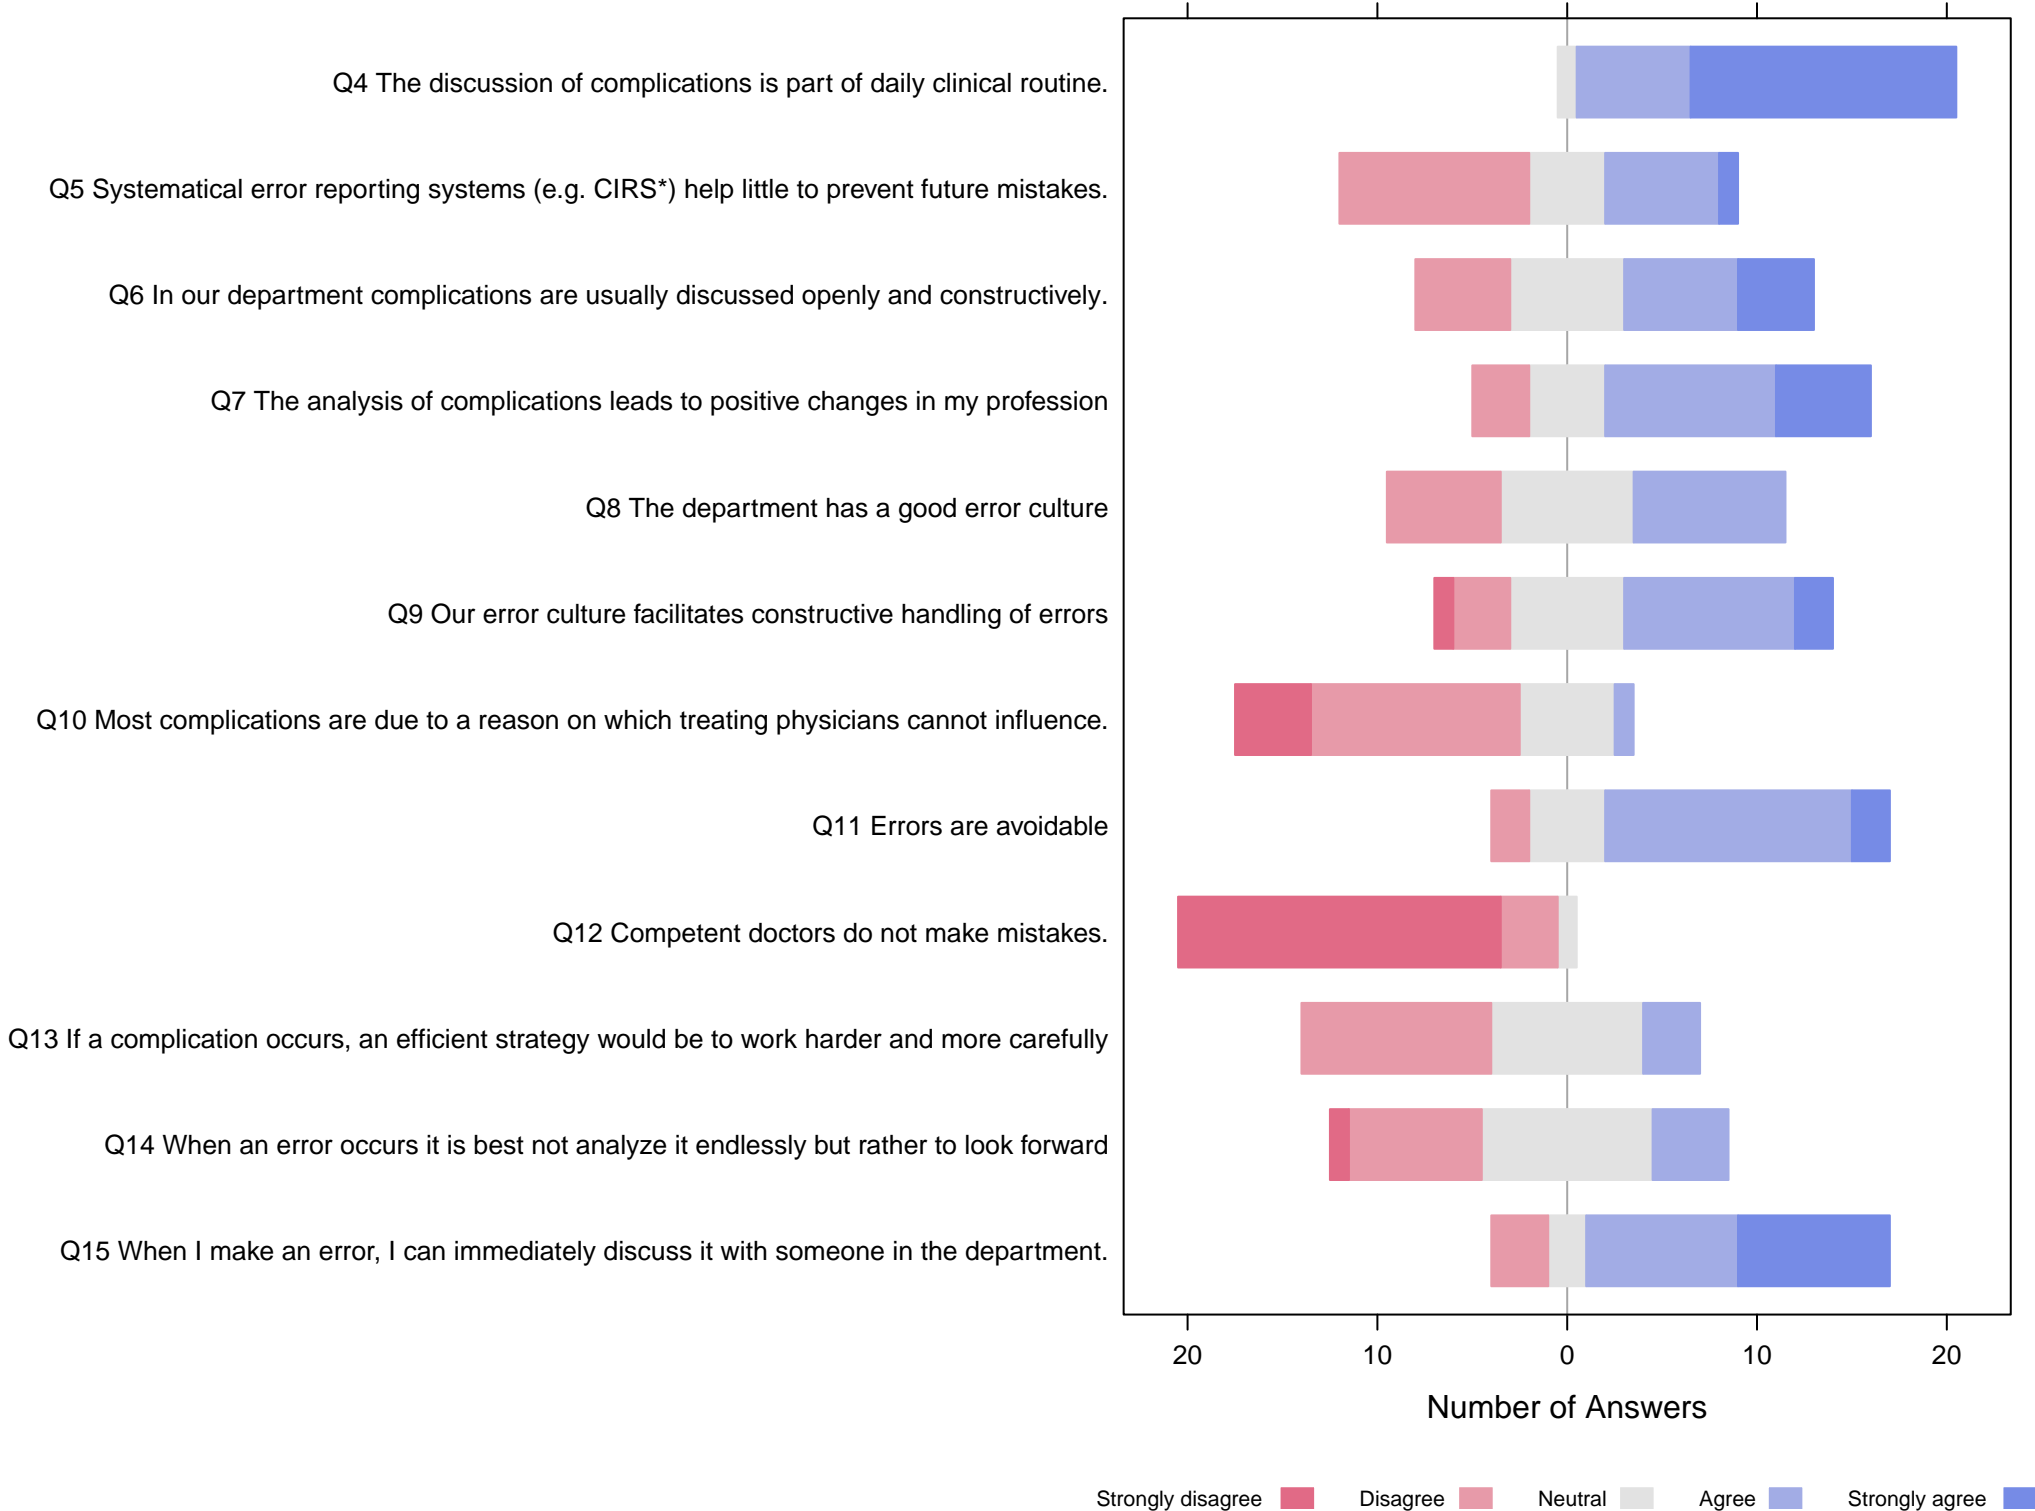

Supplement: MOESM2 [file 15768106]
